# Supplementary material for: Predicting prognosis and immune status in sarcomas by identifying necroptosis-related lncRNAs
Source: publisher site journal article supplement (doi:10.18632/aging.205383), 2024-01-08
Supplement: Supplementary file [file aging-v16i1-205383-supplementary-material-SD1.pdf]

SUPPLEMENTARY FIGURE

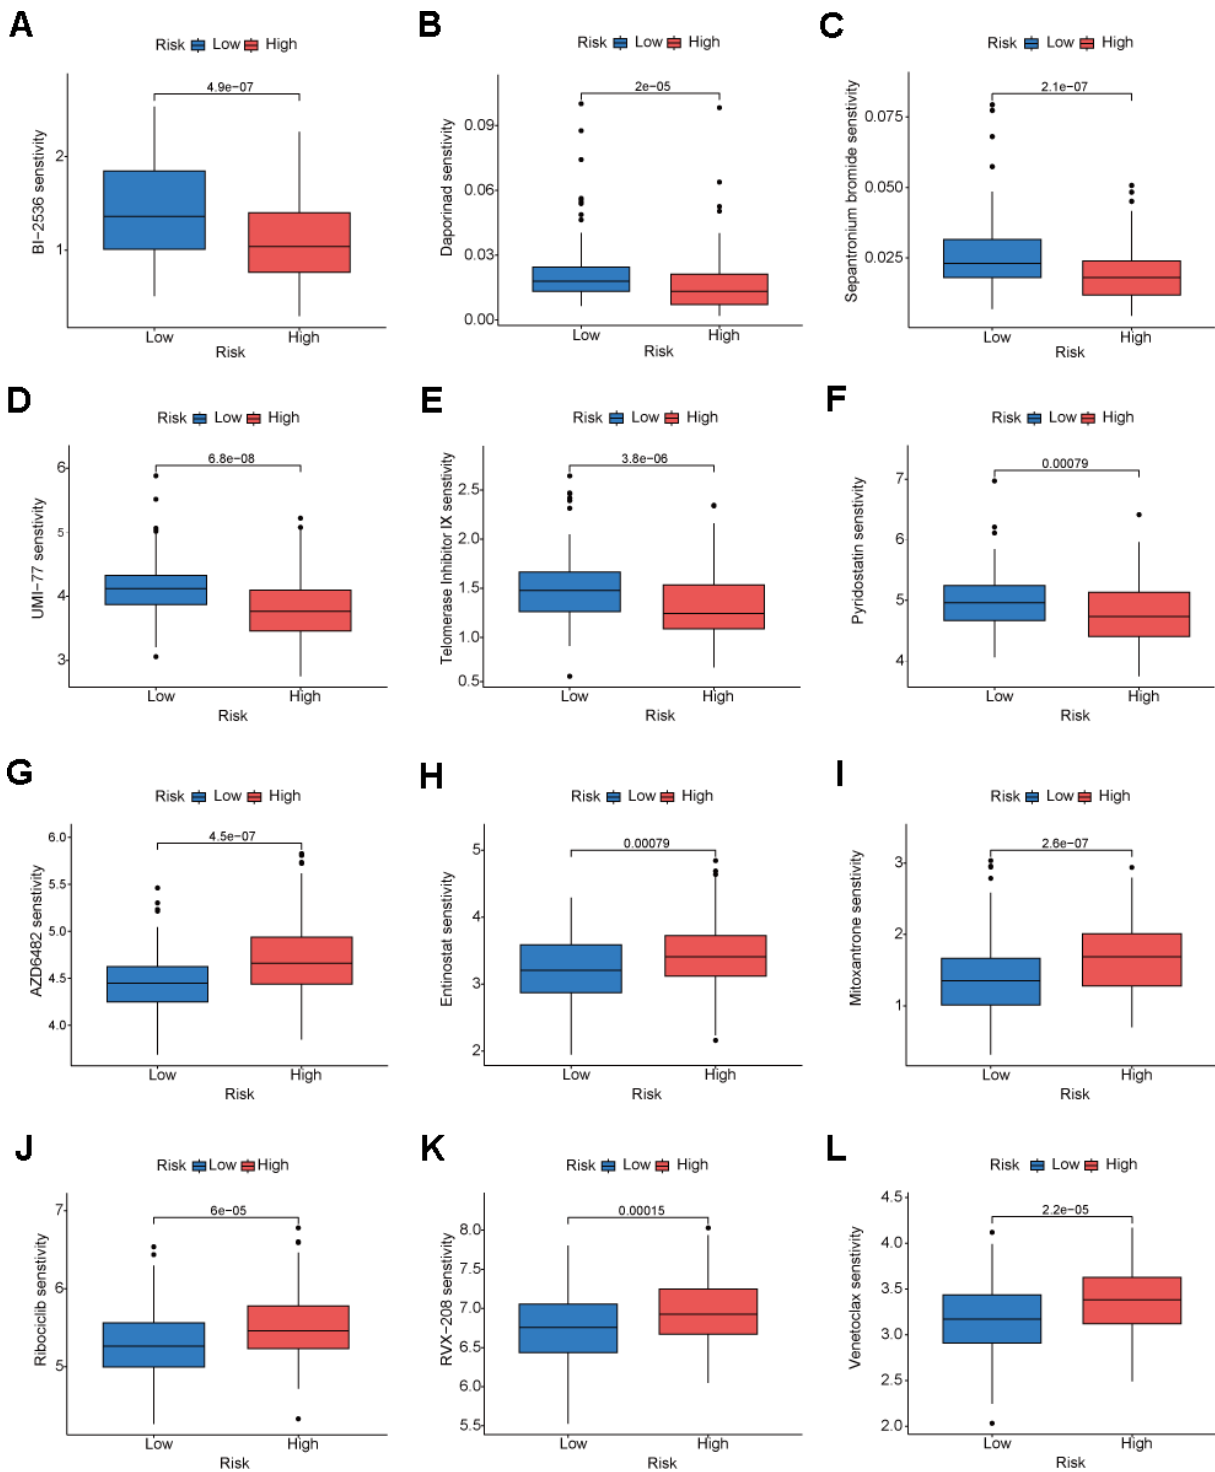

**Supplementary Figure 1.** (A–L) Analysis of drug susceptibility in risk model. (A) BI-2536, (B) Daporinad, (C) Sepantronium bromide, (D) UMI-77, (E) Telomerase Inhibitor IX, (F) Pyridostatin, (G) AZD6482, (H) Entinostat, (I) Mitoxantrone, (J) Ribociclib, (K) RVX-208, (L) Venetoclax.
